# Supplementary material for: New approaches to measurement and management for high integrity health systems
Source: HighWire-hosted journal article supplement (doi:10.1136/bmj.j1401), 2017-03-30
Supplement: bmj.j1401.pdf [file bmj.j1401.pdf]

分析

## 规划深度整合型医疗卫生体系

### Designing high integrity health systems

来源:BMJ 2017;356:j1401 doi:10.1136/bmj.j1401

Albert Mulley 及其同事提出:我们需要采用更好的工具,推进新一轮改革,这关乎患者的医疗照护,至关重要。

未能在合适的时间、合适的地点,为患者提供合适的医疗服务<sup>1-3</sup>,其结果是浪费了40%的医疗照护支出费用<sup>4-8</sup>。

正因为认识到医疗资源的这种浪费常以损害患者利益为代价,所以才掀起了全球医疗卫生政策改革的浪潮。

改革在某些设施配置改善上已显见成效,但对于缓解个性化医疗难题或促进医疗卫生体系可持续发展,目前还未在任何地方取得成功经验。深度整合的医疗卫生体系致力于提供人们所需要和所希望的医疗服务——不多不少,恰到好处,并且把患者和公众的利益置于其他所有利益相关者之上<sup>12</sup>。在本文的分析中,我们讨论新一轮改革在迈向整合医疗卫生体系的进程中,将需要采取新型评估和管理方法,以指导医疗卫生体系的运行与创新。

#### 质疑3种假说

我们选择了3个颇具影响力的、当前阻碍医疗卫生政策改革的假说<sup>12</sup>。

第一个假说是,提供的医疗服务越多,人们越健康幸福。

我们知道在高收入国家,医疗对人群健康或个体全生命过程中健康幸福的贡献相对较小。而教育机会、个人与社会因素、人们的行为以及生活改变则具有更重

#### 关键点

- 过度使用昂贵的急性病医疗照护和低效使用初级医疗照护,会造成医疗资源的浪费,不利于可持续发展
- 需要开发新的评估与管理方法,以推进新一轮改革,这种新方法将以公众和患者需求作为深度整合医疗卫生体系的重要学习来源
- 新型评估方法应帮助深度整合的医疗卫生体系实现其战略目标,即从研究群体水平的差异到共同创造能够反映个体目标与意愿的价值
- 新型管理方法应促进所有利益相关者共同承担决策责任,制定决策应考量个体和群体的需求与希望

要的作用<sup>13-14</sup>。

第二个假说是,仅凭临床证据足以确定最佳治疗方案及确保其实施。

深度整合型医疗卫生体系则明确提出制定临床方案应尊重患者的意愿与目标。这一观点正逐渐成为政府制定政策的内核,但仍需在日常实践中推行。

支持患者参与医疗照护的管理和临床决策已经减少了那些可以避免的患者无知、医疗资源浪费和对患者的损伤,但这一举措尚未在任一国家大规模推行<sup>4-18</sup>。

第三个假说是,只有医学专业人士才

Albert Mulley  
professor<sup>1</sup>,  
Angela Coulter  
senior research  
scientist<sup>2</sup>,  
Miranda Wolpert  
professor<sup>3</sup>,  
Tessa Richards  
senior editor/patient  
partnership<sup>4</sup>,  
Kamran Abbasi  
international editor<sup>4</sup>

<sup>1</sup>Dartmouth Institute  
for Health Policy and  
Clinical Practice,  
Geisel School of  
Medicine at  
Dartmouth, NH  
03756, US;

<sup>2</sup>Nuffield Department  
of Population Health,  
University of Oxford;  
<sup>3</sup>Evidence Based  
Practice and Child  
Outcomes Research  
Consortium, UCL;  
<sup>4</sup>The BMJ

梁立智 译  
首都医科大学卫生  
管理与教育学院  
肖月 校  
国家卫生计生委  
卫生发展研究中心

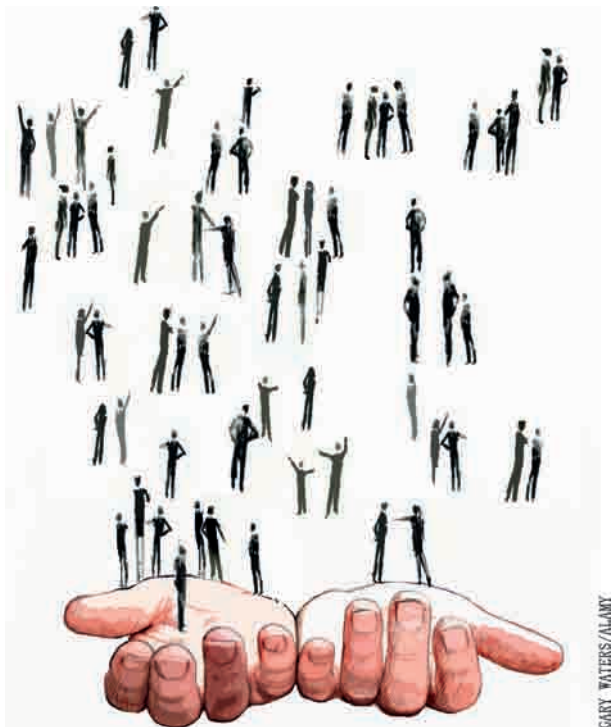

能提供有效的医疗保健。

下一轮改革将引入医疗服务新模式,它由那些能够辨清医学技术干预利弊的团队提供服务。这些团体尊重患者及其照顾者在临床决策中的专业知识、能力和创造力,并且能够设身处地地优先考虑患者的处境,包括来自患者的家庭、朋友以及更广泛社区的支持。为一线患者参与临床决策设置一套原则是深度整合型医疗卫生体系的基本任务<sup>17-20</sup>。

### 设置原则

整合型医疗卫生体系的核心战略目标是:从群体中学习并向个体传递价值观。我们通过群体获悉技术干预的效率和效益,我们到临床一线了解个体审慎权衡结局并抉择的价值取向。

在深度整合型医疗卫生体系中,人们共同参与维护群体健康,这是我们了解个体价值取向的重要途径。整合型医疗卫生体系的成功建立需要制定新的评估标准和方法,以促进人们共同承担决策责任,从临床一线医护人员到医疗卫生系统的领导,在制定决策时应知晓对于患者来说什么是最重要的。

### 评估什么是重要的

评估和透明的报告能够清晰地揭示结局和成

本差异背后的变化过程。鼓励和帮助患者了解自己的需求和希望,可以增进患者参与决策的效果。然而,一些平台的搭建却为了洞悉变化,如美国的达特茅斯阿特拉斯项目和英格兰的国家健康体系(NHS)阿特拉斯项目。一些决策辅助工具的研制是为了了解个体患者及其做出的选择,而这些选择尚未被医务人员接受,也未被临床服务的支付方认可<sup>2-3</sup>。目前,尚无一个医疗卫生系统能够有规模的成功掌握患者群体的所有需求和希望。

对一线临床实践的简单评估策略可以向医务人员和患者实时反馈服务信息,并且帮助他们建立共享决策、医疗照护方案,以及彼此联合协同医疗照护的责任。例如:患者是否认为他们在理解自身病情方面得到了帮助?他们是否被鼓励说出自己的目

### 框图1 从“想什么”到“怎么做”——英国国家健康体系的新型医疗照护模式的实施情况

2016年,有6个团队齐心协力创建了基于地理区域的医疗网络(PBCN)<sup>31</sup>。其目标是促进全英开展新型医疗照护模式的学习与交流。在6个多月的时间里,6个团队完成了以下任务:

- 他们首先将如何更好地满足特殊群体的需求和希望作为首要学习内容,如虚弱的老年人、行为异常的儿童以及青少年<sup>40</sup>
- 通过展示实施过程的变化<sup>3</sup>,他们发现了改善结局与降低成本的机会,并且把共享决策和共同制定医疗方案作为一种“微观调节”形式,通过这种方式可以把那些用于群体的购买决策告知利益相关者<sup>19</sup>,从而提高价值
- 他们实施了简单的患者报告制度,以评估临床医护人员在了解患者最大的需求上付出的努力
- 他们制作了“价值罗盘”,以满足那些既负责群体医疗质量与成本,又持续关注患者价值取向的人的需求<sup>33-41</sup>
- 他们为“改善实践操作”和“实施创新”探索了不同的管理方法,并尝试研究两项工作齐头并进的意义<sup>29</sup>
- 他们检验了在整个医疗和社会照护中,人们的健康幸福与政府投资急性病医疗照护和社区配置经济回报关系的假说<sup>39</sup>
- PBCN试点项目表明,临床医护人员、管理人员和服务购买方正逐步接受以指导新型医疗模式为目的的整体评估与管理方法。我们还需进一步证明这种整体方法与分项评估管理方法在不同条件下的可接受度和效果

标并且解释他们的最大希望是什么? 医护人员是否认为患者积极参与制定能够反映其目标的医疗方案? 患者的临床决策和医疗方案的质量是否被审查, 以确保患者知情以及整个管理过程符合患者的目标与意愿<sup>34-38</sup>?

探索新型评估方法或者有效利用既有方法, 是评价改革成败的主要指标<sup>29-38</sup>。医疗卫生系统正将一些评估方法和工具, 用于团队合作与协同医疗、平衡人群健康指标(包括患者、医护人员和支付方重视的指标)、改善与创新管理、使服务能力与专业服务行为相适、检验假说, 以确保国家医疗卫生投入的回报数量与时间合乎预期<sup>29-39</sup>。这些工具可能促进医疗卫生系统与患者、社区及其他(包括教育、就业和社会照顾)为人类健康幸福提供服务的专业人士之间建立更加深厚、互相了解的伙伴关系。有关引进该方法以推进英格兰 NHS 改革目标的描述见框图 1。

## 英国医学杂志(BMJ)的倡议

为激发有关建构整合医疗卫生体系的讨论, BMJ 正计划发表一系列文章, 引发人们关注新的协作办法, 以促进不同社会、文化背景的人群, 在成本与其国家经济可持续发展相适的政策下, 改善健康和增进幸福。

我们诚挚地邀请全世界读者, 如果有任何以改善全人类健康为目的的创新服务范例或案例研究, 都可以将论文网上提交给我们杂志, 或者与我们在线讨论论文的观点。我们的目标是建立一个涵盖所有相关领域的全球社区, 致力于通过探索和研究新型工作方法来改善人类健康。

本文志谢、作者贡献、利益竞争、来源及同行评议及参考文献详见网站 [bmj.com](http://bmj.com) 或 [bmj.yiigle.com](http://bmj.yiigle.com)

## 评论

# 建立深度整合型医疗卫生体系: 重视患者参与

肖月

国家卫生计生委卫生发展研究中心副研究员 本刊通讯编委

Albert Mulley 教授等近期发表在 *BMJ* 的文章《规划深度整合型医疗卫生体系》, 挑战了传统卫生体系改革理念, 提出医改需要尊重患者个体意愿和需求, 并使其充分参与医疗决策和服务提供过程, 以建立所谓的深度整合型医疗卫生体系。

从文中可知, 建立深度整合型医疗卫生服务体系, 不仅需要根据患者需求选择适宜的干预措施, 还应形成医患共同决策及共同参与诊疗过程的氛围。此文的撰写背景是, 欧美很多国家在进行整合型医疗卫生体系改革, 一些国家和地区, 如英国国家健康体系(NHS)和美国达特茅斯州使用 Atlas 系统, 描述临床差异, 分析患者需求, 以评估改革效果, 但因未获得医生和支付方重视, 收效甚微。对此, *BMJ* 呼吁开展全球讨论, 征集创新医疗卫生模式的案例。

此文对于当前医改有启发。当前分级诊疗制度建设、医保付费等改革, 往往从决策方和支付方角度设计针对人群的改革, 未充分关注患者个体的价值取向和需求, 缺乏分析评估患者和医生想法和感受的工具, 一些改革措施的选择和设计与实际脱节, 难以发挥改变临床诊疗行为的效果。未来改革应引入供需双方视角, 鼓励医生和患者参与决策, 合理设计改革措施, 并开发监测评价工具, 有效推动改革措施的落实。

(收稿日期: 2017-08-29)

BMJ takes no responsibility for the accuracy of the translation from the published English language original and is not liable for any errors that may occur.

# BMJ
